# Supplementary material
Source: publisher figshare collection journal article supplement (https://acs.figshare.com/ndownloader/files/5065261)

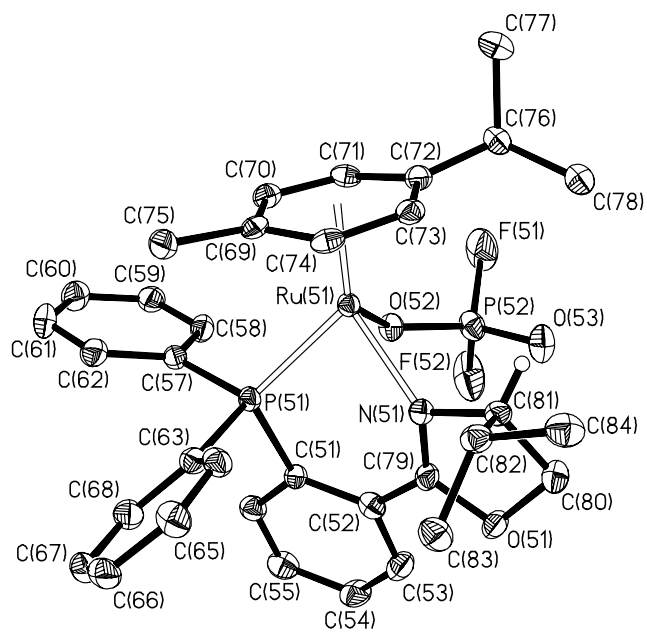

**ORTEP representation of the cation of 13d**

Supplement: Supplementary file 1 [file 5065261]
